# Supplementary material for: Polymorphism in the ELOVL6 Gene Is Associated with a Major QTL Effect on Fatty Acid Composition in Pigs
Source: PLoS One. 2013 Jan 14;8(1):e53687. doi: 10.1371/journal.pone.0053687 (PMC3544903; doi:10.1371/journal.pone.0053687)
Supplement: Table S1 — List of SNPs for SSC8 linkage map and haplotype reconstruction. (XLSX) [file pone.0053687.s001.xlsx]

## Sheet: Hoja1
SNP	Mb	cM
H3GA0055033	0.424993	0
ALGA0046028	0.849384	0
ASGA0037412	0.924576	0
H3GA0024024	0.946879	0
ALGA0122458	1.20621	0
ALGA0100804	1.2064	0
ASGA0090883	1.37289	0
ASGA0104055	1.55539	0
ASGA0037429	1.59296	0
ASGA0037420	1.65388	0
ALGA0046053	1.68527	0
H3GA0024033	1.71657	0
H3GA0024036	1.73505	0
M1GA0011609	1.76101	0
H3GA0024067	1.90167	0
H3GA0024053	1.90995	0
ALGA0046069	1.93153	0
ALGA0046091	2.02312	0.908
ALGA0046101	2.08459	0.908
ALGA0120117	2.23456	4.495
ASGA0085672	2.33113	4.495
H3GA0054036	2.5371	4.495
ASGA0092577	2.53893	4.495
ALGA0107038	2.60864	4.495
MARC0111479	2.61521	4.495
MARC0036343	2.66014	4.495
MARC0021061	2.6694	4.589
ASGA0099302	2.67494	4.684
MARC0025621	2.68456	4.778
ASGA0088843	2.69413	4.872
H3GA0056816	2.69722	4.872
ASGA0094624	3.02782	4.872
ASGA0084702	3.02806	5.242
MARC0042148	3.18001	5.612
H3GA0055098	3.18824	5.612
ASGA0094962	3.24467	5.612
ALGA0114314	3.2453	5.612
MARC0046722	3.26438	5.612
ALGA0105123	3.30505	5.612
ALGA0105748	3.35093	5.612
ASGA0092846	3.35193	5.612
ASGA0085170	3.37824	5.612
ASGA0095534	3.41824	5.922
M1GA0027094	3.53985	6.232
ALGA0104005	3.54017	6.232
MARC0003410	3.60745	6.232
ASGA0085562	3.62559	6.232
ASGA0088966	3.63024	6.232
ALGA0106161	3.63665	6.232
H3GA0055443	3.6419	6.266
ASGA0037525	3.77997	6.829
ASGA0037529	3.79718	6.851
M1GA0011703	3.81991	6.851
ASGA0037520	3.87942	6.851
ALGA0046131	3.88753	6.851
MARC0031397	4.01706	6.97
ALGA0046137	4.04626	7.089
ASGA0037542	4.07309	7.164
ALGA0046132	4.11421	7.315
ASGA0105084	4.21133	7.683
H3GA0055121	4.32384	8.1
ASGA0082595	4.34829	8.1
ASGA0037550	5.06585	14.783
ASGA0037551	5.09439	14.783
DRGA0008260	5.11588	14.783
ALGA0046149	5.17263	14.783
H3GA0024172	5.1912	14.783
ALGA0046168	5.25717	14.947
ASGA0037591	5.30115	14.965
DRGA0008265	5.32306	15.018
H3GA0024195	5.37232	15.825
ALGA0046183	5.44256	15.825
CASI0010213	5.4463	15.825
MARC0022033	5.46651	15.825
ALGA0123062	5.47676	15.825
MARC0057101	5.58677	15.825
ALGA0105801	5.68008	15.867
ASGA0097211	5.72655	15.881
ALGA0120793	5.74821	15.896
ASGA0092860	5.77563	16.225
MARC0036037	5.82952	16.225
ALGA0114359	5.92281	16.225
ASGA0088986	5.94525	16.225
MARC0064683	5.94977	16.225
ASGA0101222	5.98451	16.225
ASGA0106142	6.00925	16.225
ASGA0102441	6.20981	16.225
ASGA0037686	6.25419	16.225
ALGA0046317	6.29559	16.225
MARC0054934	6.36733	16.417
ALGA0046303	6.38416	16.528
MARC0036899	6.46529	16.639
ASGA0099124	6.46976	16.639
ALGA0046283	6.55122	16.953
ASGA0037662	6.58142	17.009
H3GA0024222	6.61635	17.053
M1GA0011792	6.63775	17.075
MARC0051913	6.65011	17.126
ASGA0092066	6.74398	17.126
ALGA0105308	6.74838	17.467
MARC0011781	6.75628	17.467
MARC0062468	6.79349	17.467
ASGA0083991	6.83233	17.467
ALGA0115068	6.89383	17.467
M1GA0024188	6.90335	17.774
ALGA0107380	6.9048	17.882
ASGA0104681	6.90638	17.882
ALGA0123384	6.90861	17.882
MARC0101097	6.999	17.882
ASGA0037638	7.05095	17.882
MARC0059599	7.05799	17.882
ASGA0037649	7.08078	17.882
DRGA0008277	7.09522	17.882
ASGA0102531	7.10322	17.882
ASGA0085447	7.24306	18.09
ASGA0094342	7.34256	18.298
ALGA0046257	7.49406	18.298
M1GA0011790	7.53472	18.298
ALGA0046225	7.57279	18.298
ALGA0046221	7.58565	18.298
ALGA0046204	7.63918	18.298
ALGA0046186	7.69543	18.298
ASGA0037601	7.71331	18.298
ALGA0046197	7.77817	18.298
ALGA0046190	7.81203	18.298
ALGA0124017	7.87586	19.135
ALGA0106504	7.94728	19.146
ALGA0102137	8.14525	19.146
ASGA0102322	8.19621	19.146
MARC0070206	8.29247	19.146
ALGA0123115	8.30629	19.146
ASGA0096928	8.31039	19.146
ASGA0097536	8.34211	19.146
MARC0077121	8.47902	21.294
ASGA0093104	8.54866	21.294
ASGA0092148	8.58964	21.294
ALGA0114875	8.81821	21.294
ASGA0094688	8.84016	21.294
ASGA0094982	8.86988	21.294
ALGA0104225	8.93456	21.294
ALGA0046330	8.99381	21.294
ASGA0037687	9.02693	21.294
H3GA0024236	9.05202	21.294
ASGA0037695	9.08013	21.294
ALGA0046350	9.11289	21.294
ASGA0037704	9.15256	21.294
ALGA0046364	9.2625	21.294
ASGA0037725	9.29488	21.294
ALGA0046367	9.35178	21.294
MARC0088853	9.45575	21.294
ASGA0037733	9.48048	21.294
DRGA0008295	9.49413	21.294
ALGA0046376	9.63962	21.294
MARC0095540	9.67576	21.294
M1GA0011796	9.71563	21.294
ASGA0037752	9.7363	21.532
MARC0019127	9.76865	21.771
DRGA0008302	9.83306	21.771
H3GA0024257	9.89132	21.771
ALGA0103700	10.0361	21.771
MARC0004340	10.0378	21.771
ALGA0106179	10.1	21.771
ALGA0121866	10.102	21.771
ALGA0046395	10.1161	21.771
ASGA0037781	10.1726	22.019
ALGA0046407	10.2043	22.042
ALGA0046426	10.249	22.055
ASGA0037767	10.2591	22.077
DIAS0003188	10.3763	22.184
ALGA0122396	10.3909	22.215
MARC0030290	10.4514	22.215
H3GA0056471	10.4534	22.811
ASGA0104317	10.4821	23.106
ASGA0083789	10.5196	23.106
DIAS0001942	10.5459	23.106
ASGA0099046	10.6695	23.106
ASGA0093410	10.7063	23.106
MARC0051752	10.7249	23.106
MARC0003302	10.7755	23.106
ALGA0104141	10.8151	23.106
MARC0006698	10.8717	23.228
ALGA0102711	10.9072	23.465
H3GA0055075	10.9133	23.465
ALGA0101230	10.9185	23.465
ALGA0112294	10.9862	23.465
ALGA0103270	10.9937	23.465
ALGA0111823	11.0174	23.465
ASGA0096162	11.0218	23.465
ASGA0096151	11.0286	23.465
ASGA0097658	11.0363	23.465
ALGA0122219	11.045	23.465
MARC0090405	11.0679	23.465
H3GA0054129	11.0684	23.465
ASGA0090227	11.114	23.465
ASGA0037801	11.1316	23.465
MARC0056489	11.1619	23.465
MARC0054739	11.1791	23.465
ASGA0037799	11.2184	23.465
ALGA0046431	11.2341	23.465
M1GA0011801	11.2632	23.929
M1GA0011802	11.2858	23.982
MARC0040190	11.3192	24.497
MARC0034108	11.3236	24.497
ASGA0092113	11.3418	24.497
H3GA0052944	11.3431	24.497
MARC0049636	11.3494	24.497
ASGA0096118	11.402	24.497
M1GA0011804	11.4319	24.497
H3GA0024295	11.4551	24.497
ALGA0046459	11.4783	24.497
MARC0101370	11.5147	24.497
H3GA0024299	11.556	24.497
ASGA0037818	11.5691	24.497
ALGA0046443	11.5808	24.497
ALGA0046438	11.6022	24.497
ALGA0112747	11.676	25.015
ALGA0107012	11.8329	25.627
MARC0051945	11.8699	26.238
MARC0082849	11.8849	26.238
DRGA0008310	11.9172	26.238
ALGA0046479	11.946	26.238
ASGA0037845	11.9628	26.238
ALGA0103589	12.1445	26.238
ASGA0100605	12.1536	26.238
MARC0015743	12.167	26.238
MARC0051546	12.1972	26.238
ASGA0094463	12.2872	26.238
ALGA0113480	12.3085	26.36
CASI0008297	12.3244	26.714
ASGA0089394	12.3857	27.067
ASGA0084322	12.3902	27.067
ALGA0108110	12.4076	27.067
ALGA0116260	12.4257	27.067
ASGA0083420	12.4426	27.067
H3GA0024312	12.4627	27.067
ASGA0037859	12.476	27.067
ALGA0106153	12.4839	27.067
ASGA0037865	12.5013	27.067
MARC0083976	12.6953	27.067
H3GA0024318	12.8078	27.067
ALGA0046501	12.8441	27.067
H3GA0024320	12.8814	27.067
ALGA0046509	12.906	27.067
DRGA0008311	12.9841	27.462
H3GA0024325	13.0911	27.857
MARC0059048	13.1394	28.253
ALGA0107910	13.3789	28.648
CASI0003674	13.4106	28.648
H3GA0055990	13.4389	28.648
MARC0081753	13.5592	28.648
ALGA0046521	13.6009	28.648
DRGA0008317	13.6297	28.648
ASGA0037872	13.6741	28.66
ASGA0037875	13.6982	28.695
ALGA0046527	13.7303	28.975
MARC0016208	13.7484	28.975
ALGA0046513	13.7661	28.975
MARC0067231	13.7978	28.975
ASGA0104872	13.9066	28.975
ASGA0037879	13.9148	28.975
MARC0036889	13.941	28.975
ALGA0119178	13.9481	28.975
DRGA0008319	13.9513	28.975
ASGA0096165	14.0142	28.975
ALGA0046534	14.0989	28.975
ALGA0046536	14.1121	28.975
ALGA0046538	14.1571	28.975
H3GA0024333	14.1846	28.975
ALGA0046533	14.2398	28.975
ALGA0046542	14.2446	28.975
ASGA0037886	14.282	28.975
ALGA0046546	14.4038	28.975
ASGA0037889	14.4134	28.975
MARC0104384	14.7483	28.975
MARC0094943	14.8233	28.975
MARC0054361	14.8361	28.975
MARC0001707	14.8538	28.975
ALGA0114672	14.8716	28.975
ASGA0092178	14.9465	28.975
MARC0052559	15.0127	28.975
MARC0052560	15.0127	28.975
MARC0021322	15.073	28.975
ALGA0104210	15.0902	28.975
ASGA0037906	15.1812	28.975
ASGA0037899	15.2138	28.975
ALGA0046558	15.2313	28.975
MARC0070512	15.3236	28.975
ALGA0109256	15.3395	28.975
MARC0038680	15.3535	28.975
MARC0065654	15.3592	28.975
ASGA0037898	15.3734	28.975
H3GA0024339	15.3917	28.975
H3GA0024338	15.4088	28.975
M1GA0011817	15.4294	28.975
ASGA0082094	15.465	28.975
ASGA0037908	15.5068	28.975
ASGA0037912	15.5365	28.975
ALGA0046571	15.6183	28.975
DRGA0008338	15.6551	28.975
ALGA0046580	15.6963	28.975
ASGA0037921	15.7102	28.975
ALGA0046582	15.7323	28.975
H3GA0024350	15.7584	28.975
ALGA0046587	15.8701	28.975
DRGA0008346	15.8869	28.975
ALGA0046590	15.9124	28.975
ALGA0046591	15.9435	28.975
ASGA0037929	15.9921	28.975
DRGA0008347	16.0142	28.975
MARC0001526	16.0964	28.975
ASGA0104576	16.1435	28.975
ASGA0038639	16.2027	33.295
SIRI0000824	16.2157	33.295
ALGA0047575	16.2426	33.295
H3GA0024356	16.3512	36.606
ALGA0046607	16.393	36.949
ASGA0037935	16.4151	37.292
ALGA0046611	16.4454	37.636
ALGA0046615	16.466	37.636
ALGA0046619	16.516	37.636
ASGA0037939	16.5372	37.636
MARC0005262	16.556	37.636
ALGA0046633	16.6175	37.636
MARC0074016	16.6445	37.636
ASGA0037942	16.6817	37.636
MARC0095070	16.7239	37.636
ALGA0046640	16.7474	37.636
H3GA0024367	16.7744	37.636
ASGA0037945	16.7955	37.636
ASGA0037950	16.8144	37.636
ALGA0119511	16.9033	37.636
MARC0043725	16.9042	37.636
ALGA0113441	16.9711	37.636
ASGA0084241	17.0199	37.636
MARC0018748	17.0272	38.35
MARC0053517	17.0526	39.065
ALGA0114335	17.2136	39.065
ASGA0037952	17.2525	39.065
MARC0007449	17.3217	39.065
ASGA0037960	17.3548	39.065
ALGA0046671	17.4071	39.065
ALGA0046678	17.4284	39.065
ASGA0037967	17.4668	39.065
ALGA0046683	17.5033	39.065
ASGA0037971	17.5309	39.065
ALGA0046691	17.5639	39.065
MARC0010452	17.5764	39.065
ALGA0110538	17.5797	39.065
ASGA0094760	17.6172	39.065
H3GA0024402	17.7325	39.065
MARC0008320	17.7577	39.065
DRGA0008367	17.8063	39.065
DRGA0008365	17.8197	39.065
H3GA0024400	17.8401	39.065
ASGA0037984	17.8627	39.065
ALGA0046694	17.889	39.065
ALGA0105148	17.9924	39.561
H3GA0024406	18.0126	39.561
H3GA0024407	18.0406	39.561
ALGA0046711	18.065	39.561
MARC0082228	18.0906	39.561
ALGA0046715	18.116	39.561
ALGA0046718	18.1462	39.561
H3GA0024411	18.1699	39.561
MARC0027348	18.2311	39.708
MARC0036883	18.2362	40.169
MARC0091694	18.243	40.169
MARC0000247	18.2788	40.169
ASGA0099288	18.2818	40.169
ASGA0095935	18.3823	40.169
ASGA0038035	18.4096	40.169
MARC0026890	18.4223	40.224
MARC0035230	18.4449	40.237
H3GA0024419	18.4775	40.27
ALGA0046739	18.5145	40.534
MARC0027581	18.5355	41.335
ALGA0046732	18.5408	41.335
DIAS0002641	18.5408	41.335
M1GA0011821	18.5651	41.335
ASGA0038045	18.6613	41.335
MARC0085659	18.6892	41.335
ASGA0038039	18.7123	41.335
H3GA0024439	18.757	41.335
ASGA0038060	18.7688	41.335
ALGA0046784	18.8229	41.866
ALGA0046782	18.8423	42.318
ALGA0046780	18.8561	42.318
ALGA0046779	18.8871	42.318
ASGA0038065	18.915	42.318
MARC0049092	18.9184	42.318
MARC0073259	18.9746	42.318
ASGA0085677	19.1212	42.318
MARC0012364	19.1396	42.318
ASGA0101459	19.1408	42.318
ASGA0105209	19.142	42.318
H3GA0055060	19.2298	42.318
MARC0103283	19.2414	42.318
ALGA0119087	19.2523	42.318
H3GA0053179	19.2814	42.318
ASGA0105121	19.3	42.318
MARC0068240	19.3351	43.741
MARC0068241	19.3352	44.133
INRA0060430	19.3381	45.216
MARC0012020	19.347	45.216
ALGA0118376	19.3523	45.216
ALGA0111910	19.4623	45.216
MARC0067926	19.4686	45.216
ALGA0104156	19.5106	45.216
ASGA0083405	19.5202	45.216
ASGA0100105	19.5212	45.216
DRGA0008372	19.6612	45.216
H3GA0024448	19.7473	45.216
ALGA0102999	19.7495	45.216
ASGA0089983	19.7566	45.216
ASGA0105552	19.7708	45.216
ASGA0081799	19.7801	45.216
MARC0063171	19.7817	45.216
H3GA0024473	19.8327	45.216
ASGA0038088	19.8484	45.216
DIAS0004272	19.8736	45.216
ALGA0046838	19.9032	45.216
ASGA0038091	19.9406	45.216
ASGA0038111	19.9691	45.216
ALGA0046831	20.0032	45.437
ALGA0046799	20.0653	45.658
MARC0006286	20.0942	45.658
H3GA0056590	20.1181	45.658
ALGA0111129	20.1248	45.658
MARC0058342	20.1422	45.658
MARC0017191	20.1445	45.658
ASGA0099595	20.1743	45.658
ALGA0111963	20.2387	45.658
MARC0028884	20.2745	45.658
ALGA0112514	20.2952	45.658
MARC0017694	20.2955	45.658
DBWU0000625	20.3354	46.316
ALGA0114249	20.368	46.974
ALGA0103382	20.3851	46.974
ALGA0120242	20.3887	46.974
ALGA0106198	20.412	46.974
ASGA0098380	20.4622	46.974
ASGA0084078	20.4846	46.974
CADI0000659	20.5706	47.293
ALGA0111269	20.5733	47.611
MARC0112253	20.7278	47.634
ALGA0046842	20.7663	47.634
ASGA0038130	20.7716	47.634
H3GA0024493	20.7952	47.634
DRGA0008376	20.8452	47.634
H3GA0024489	20.9141	47.634
ASGA0038125	20.9487	47.634
ALGA0046848	21.0009	47.634
ALGA0046856	21.0711	47.634
MARC0008642	21.1107	47.634
H3GA0024496	21.1482	47.634
ALGA0046861	21.1741	47.634
H3GA0024494	21.1862	47.634
ALGA0046880	21.2643	47.634
MARC0075502	21.2778	47.634
ALGA0046885	21.3234	47.634
MARC0039502	21.3404	47.634
MARC0065652	21.38	47.634
M1GA0011844	21.4041	47.634
ALGA0046878	21.4296	47.634
ALGA0046899	21.4817	47.634
ALGA0046894	21.5074	47.634
MARC0020867	21.5261	47.634
ALGA0046905	21.5556	47.634
ASGA0038175	21.5772	47.634
ASGA0038170	21.6216	47.634
MARC0002194	21.7146	47.634
MARC0077431	21.763	47.634
ALGA0117966	21.8813	47.634
ALGA0118435	21.901	47.634
ALGA0046920	22.0949	47.634
ALGA0046928	22.1157	47.634
ALGA0111870	22.1303	47.634
ALGA0046934	22.1424	47.634
MARC0044718	22.1489	47.634
ALGA0046922	22.1805	47.634
ALGA0046915	22.2171	47.634
MARC0086293	22.2398	47.634
ALGA0110968	22.5411	47.634
ASGA0097635	22.5654	47.634
ALGA0046943	22.7076	47.634
ASGA0038196	22.729	47.634
DRGA0008400	22.7677	47.634
ASGA0038189	22.8055	47.634
ASGA0091667	22.8636	47.634
MARC0082286	22.904	47.634
ASGA0100864	23.0512	47.773
ALGA0113222	23.0912	47.9
ALGA0108161	23.0964	47.966
ASGA0038200	23.1477	48.032
ALGA0046944	23.2092	48.241
H3GA0024523	23.2346	48.9
ALGA0046955	23.2698	48.9
H3GA0024526	23.299	48.9
MARC0077989	23.3287	48.9
ASGA0038209	23.3811	48.9
ALGA0046969	23.4026	48.9
ALGA0046971	23.4238	48.9
DRGA0008412	23.521	48.9
DRGA0008413	23.562	48.9
ASGA0038214	23.585	48.9
H3GA0024530	23.6016	48.9
DRGA0017702	23.6916	48.933
ALGA0106023	23.9148	49.215
ASGA0095677	23.9168	49.215
ALGA0118517	23.9358	49.215
ASGA0083020	24.0334	49.215
ASGA0089289	24.2987	49.215
M1GA0011852	24.3193	49.215
DRGA0008416	24.3356	49.215
DRGA0008418	24.3863	49.215
H3GA0024533	24.477	49.215
ASGA0038216	24.5429	49.215
MARC0038273	24.5682	49.215
ALGA0046986	24.5869	49.215
MARC0021747	24.6001	49.215
DRGA0008421	24.6164	49.215
DRGA0008423	24.647	49.215
DRGA0008425	24.6701	49.215
MARC0048798	24.708	49.215
ALGA0046994	24.7178	49.215
DRGA0008427	24.7479	49.215
ASGA0092531	24.809	49.215
ALGA0119566	25.0201	49.215
CASI0008535	25.0804	49.215
ASGA0090747	25.2026	49.215
ASGA0105183	25.3044	49.215
ASGA0094767	25.6461	49.215
ASGA0038220	25.948	49.215
ASGA0038219	26.0125	49.215
DRGA0008434	26.1904	49.215
ASGA0038225	26.2306	49.215
ALGA0047007	26.2541	49.215
ALGA0047010	26.2971	49.215
ASGA0038228	26.3103	49.215
ALGA0047018	26.3332	49.215
ASGA0095378	26.4577	49.215
ALGA0118083	26.5216	49.215
MARC0028635	26.5658	49.215
H3GA0024542	26.7137	49.215
ALGA0047027	26.7349	49.215
DRGA0008446	26.7574	49.215
ALGA0105884	26.7592	49.215
ALGA0047032	26.7621	49.215
ASGA0038231	26.7936	49.215
H3GA0024539	26.8151	49.215
ALGA0047029	26.8335	49.215
ASGA0038232	26.8479	49.215
ALGA0047034	26.8789	49.215
ALGA0047036	26.9074	49.215
ALGA0047037	26.941	49.215
INRA0029418	26.9613	49.215
INRA0029420	27.0096	49.215
ALGA0047039	27.0732	49.215
ASGA0038241	27.1213	49.215
ALGA0047040	27.1489	49.215
M1GA0011855	27.1853	49.215
ALGA0047042	27.2155	49.215
DRGA0008451	27.2385	49.215
ALGA0047043	27.2764	49.215
H3GA0024546	27.3048	49.215
ASGA0101054	27.3304	49.215
ALGA0047048	27.3964	49.215
H3GA0024547	27.4267	49.215
MARC0036242	27.4474	49.215
ALGA0047052	27.4926	49.215
DRGA0008456	27.5839	49.215
DRGA0008458	27.6201	49.215
ALGA0047063	27.6424	49.215
ASGA0038252	27.6694	49.215
ASGA0038253	27.6898	49.215
INRA0029430	27.7249	49.995
ASGA0038254	27.7387	49.995
MARC0059842	27.7682	49.995
DRGA0008464	27.7981	49.995
ALGA0047075	27.8433	49.995
ALGA0047077	27.893	49.995
DRGA0008467	27.9632	49.995
H3GA0024561	27.9922	49.995
ASGA0038260	28.0512	49.995
DRGA0008472	28.2696	49.995
MARC0040960	28.531	49.995
ALGA0047086	28.6792	49.995
INRA0029443	28.6927	49.995
ALGA0047089	28.7405	49.995
MARC0102624	28.7521	49.995
ASGA0038265	28.7733	49.995
INRA0029451	28.7971	49.995
ALGA0047092	28.8259	49.995
ALGA0047098	28.8539	49.995
ALGA0047102	28.8924	49.995
DRGA0008476	28.9318	49.995
DRGA0008477	28.972	49.995
ALGA0047107	28.9961	49.995
ALGA0047109	29.0265	49.995
DRGA0008480	29.0566	49.995
MARC0063481	29.096	50.201
ALGA0047118	29.1427	50.407
MARC0007719	29.1572	50.407
ALGA0047119	29.1691	50.407
ASGA0038280	29.1968	50.407
ALGA0047127	29.2545	50.407
H3GA0024571	29.2685	50.407
MARC0083991	29.2953	50.407
ASGA0038287	29.3147	50.407
ALGA0047140	29.3371	50.407
ASGA0105386	29.3966	50.407
MARC0054253	29.4708	50.407
DRGA0008486	29.5129	50.407
ALGA0047146	29.5343	50.407
H3GA0024575	29.5576	50.407
MARC0027178	29.5906	50.407
H3GA0024578	29.6249	50.407
MARC0034185	29.6605	50.407
DRGA0008493	29.6928	50.407
ASGA0038302	29.7252	50.407
ASGA0038303	29.7581	50.407
H3GA0024582	29.8109	50.407
DRGA0008496	29.8372	50.407
ALGA0047172	29.9207	50.702
MARC0066508	29.9909	51.264
ASGA0038311	30.0079	51.264
ALGA0047182	30.0195	51.264
ASGA0038316	30.0331	51.264
ALGA0105915	30.1933	51.264
MARC0030915	30.1948	51.264
ASGA0100258	30.2194	51.304
MARC0075574	30.2362	51.304
CASI0008592	30.2923	51.325
ASGA0038318	30.3344	51.342
ALGA0047192	30.3565	51.368
ASGA0038320	30.3768	51.393
MARC0058450	30.4004	51.41
DRGA0008501	30.4279	51.427
ALGA0047217	30.4581	51.481
ALGA0047222	30.4852	51.503
M1GA0011866	30.5063	51.551
ASGA0038345	30.5274	51.586
MARC0001414	30.5492	51.586
H3GA0024611	30.5962	51.599
H3GA0024605	30.6055	51.611
MARC0077800	30.622	51.68
ALGA0047235	30.6443	51.692
ASGA0038355	30.6842	51.692
ASGA0101165	30.7415	51.692
ALGA0047245	30.794	51.692
ALGA0047251	30.8208	52.007
MARC0034036	30.8427	52.046
MARC0046003	30.8694	52.119
MARC0066088	30.9002	52.119
MARC0057199	30.9108	52.119
ASGA0038383	30.9349	52.119
ALGA0047284	30.9526	52.119
ALGA0047289	31.0345	52.119
H3GA0024648	31.0858	52.689
ALGA0047307	31.1121	52.689
MARC0109216	31.1433	52.689
ALGA0047322	31.197	52.689
ALGA0047327	31.2265	52.689
MARC0022175	31.2459	52.689
ASGA0038427	31.2841	52.689
ALGA0047340	31.3464	52.83
ASGA0038440	31.3672	53.238
ALGA0047344	31.3981	53.836
ALGA0047350	31.4453	53.836
ALGA0047359	31.4677	53.836
H3GA0024679	31.4952	53.836
M1GA0011887	31.5252	53.836
H3GA0054605	31.5609	53.836
ASGA0038470	31.5934	54.264
ASGA0038478	31.6416	54.264
ASGA0038488	31.6886	54.264
DIAS0000782	31.7369	54.264
ALGA0047393	31.7652	54.264
M1GA0011889	31.7788	54.264
ALGA0047395	31.8038	54.264
M1GA0011891	31.8487	54.264
H3GA0024700	31.875	54.264
ALGA0104055	32.0688	54.264
ALGA0115248	32.0975	54.264
ASGA0085559	32.103	54.264
ASGA0106345	32.105	54.264
ALGA0108672	32.1077	54.264
MARC0026889	32.114	54.264
ALGA0104633	32.144	54.264
ALGA0110403	32.1507	54.264
DIAS0001596	32.1551	54.264
ALGA0110393	32.157	54.264
MARC0086383	32.1698	54.264
DIAS0001065	32.2008	54.264
MARC0091439	32.2844	54.264
ASGA0100246	32.2937	54.264
ASGA0101895	32.3551	54.264
ALGA0116128	32.4914	54.264
MARC0054052	32.8484	54.264
ASGA0038503	32.917	54.264
H3GA0024701	32.9341	54.264
ALGA0047421	32.9845	54.264
ALGA0047418	33.033	54.264
MARC0049662	33.0684	54.282
M1GA0011894	33.0907	54.3
ASGA0038506	33.1039	54.327
ALGA0047409	33.1239	55.244
ALGA0122319	33.1502	55.244
ASGA0038550	33.2092	55.244
ASGA0038543	33.2611	55.244
H3GA0024720	33.2828	55.244
MARC0031721	33.3131	55.244
DRGA0008514	33.3507	55.244
MARC0075877	33.3659	55.244
ASGA0101128	33.3768	55.244
MARC0076321	33.4648	55.244
MARC0002866	33.7404	55.244
H3GA0056028	33.7407	55.244
MARC0012123	33.7609	55.244
MARC0019146	33.8529	55.789
MARC0082316	33.9185	55.789
ASGA0103730	33.9236	56.335
MARC0039549	33.9339	56.335
ALGA0119242	33.9399	56.335
ASGA0091118	33.9605	56.686
ALGA0047440	33.9858	56.97
DRGA0008518	34.0673	56.97
ASGA0038555	34.0905	56.97
ALGA0100515	34.1276	56.97
ALGA0047444	34.1284	56.97
ALGA0047449	34.2692	56.97
MARC0017675	34.3354	56.97
ALGA0047457	34.3604	56.97
ALGA0047461	34.3946	56.97
ASGA0038568	34.4158	56.97
ASGA0038572	34.4286	56.97
MARC0083600	34.4399	56.97
MARC0033791	34.4644	56.97
ASGA0093522	34.4675	56.97
ASGA0093882	34.5383	56.97
ALGA0047464	34.6226	57.54
DRGA0008528	34.6748	57.955
H3GA0024739	34.7282	57.955
ALGA0047473	34.7467	57.994
ALGA0047477	34.7951	57.994
MARC0078127	34.8108	57.994
ASGA0038586	34.8175	57.994
ALGA0047484	34.849	57.994
ALGA0047487	34.8665	57.994
MARC0042079	34.8792	57.994
ALGA0047492	34.9042	57.994
MARC0082463	34.933	57.994
ASGA0038599	34.954	57.994
H3GA0024755	34.9741	57.994
MARC0027363	34.996	57.994
ALGA0114301	35.0315	57.994
ASGA0091736	35.0475	57.994
ALGA0112701	35.0493	57.994
ALGA0103800	35.0602	57.994
ASGA0090097	35.1194	57.994
ASGA0038607	35.181	57.994
ALGA0047511	35.2162	57.994
DRGA0008541	35.2526	57.994
ALGA0047524	35.286	57.994
ASGA0038613	35.3061	57.994
ALGA0047530	35.3288	57.994
ALGA0047534	35.3949	57.994
ALGA0047539	35.4309	57.994
ASGA0038626	35.4829	58.569
ALGA0047564	35.5268	58.858
ALGA0047569	35.555	58.858
H3GA0055175	35.6392	58.858
ALGA0103826	35.6471	58.858
ALGA0106151	35.669	58.858
ASGA0090208	35.7744	58.858
ALGA0108352	35.7811	58.858
ASGA0094469	35.8661	58.858
MARC0103250	35.8922	58.858
ASGA0102686	35.945	58.858
ASGA0091078	36.0987	58.858
MARC0034025	36.1309	58.858
ALGA0047587	36.2206	58.858
ALGA0047585	36.2681	58.858
MARC0036881	36.3114	58.858
ALGA0107087	36.4802	58.858
ALGA0106255	36.4839	58.858
ASGA0096959	36.5431	58.858
ALGA0047605	36.6347	58.858
ASGA0038656	36.6584	58.858
ALGA0047606	36.7192	58.858
ASGA0038654	36.7496	58.858
ALGA0047595	36.7692	58.858
ASGA0038659	36.8088	58.858
ALGA0105146	36.868	58.858
MARC0086080	36.8867	58.858
DIAS0000454	36.8873	58.858
DIAS0004271	36.8999	58.858
ASGA0093261	36.973	58.858
ASGA0096723	37.0296	58.858
ASGA0097614	37.0536	58.858
ALGA0047611	37.3401	58.858
ASGA0092631	37.4194	58.858
H3GA0024778	37.4465	58.858
H3GA0024780	37.4586	58.858
ALGA0047617	37.4925	58.858
H3GA0024781	37.514	58.858
MARC0002049	37.5264	58.858
ALGA0047619	37.5574	58.858
ALGA0047621	37.6217	58.858
ASGA0088957	37.7315	58.858
ASGA0091312	37.7463	58.858
MARC0103983	37.7979	58.858
ALGA0114540	37.8388	58.858
CASI0006231	37.8563	58.858
MARC0082220	37.8727	58.858
ALGA0047624	37.9698	58.858
ASGA0038666	37.9835	58.858
DRGA0008548	38.2933	58.858
ASGA0038670	38.3752	58.858
ASGA0038672	38.4004	58.858
ALGA0047635	38.4393	58.858
MARC0029632	38.4744	58.858
ASGA0038682	38.4988	58.858
ASGA0038685	38.5354	58.858
ASGA0038686	38.5656	58.858
ALGA0047649	38.624	58.858
ALGA0047654	38.6913	58.858
ALGA0047653	38.7159	58.858
ALGA0047652	38.7219	58.858
ASGA0103358	38.7713	58.858
ALGA0047663	38.7812	58.858
MARC0026493	38.8149	58.858
MARC0100246	38.8936	58.858
DRGA0008560	38.9248	58.858
ALGA0106128	38.9715	58.858
ALGA0047671	38.973	58.858
ALGA0047672	39.0149	58.858
ALGA0111622	39.1534	58.858
ALGA0109712	39.1883	58.858
ASGA0038698	39.2719	58.858
BGIS0004952	39.3007	58.858
INRA0029763	39.3178	58.858
ASGA0038697	39.3516	58.858
MARC0092707	39.3662	58.858
ALGA0047675	39.3951	58.858
ALGA0105374	39.4679	58.858
MARC0064308	39.4775	58.858
ALGA0107941	39.4856	58.858
ASGA0104555	39.5547	58.858
H3GA0056129	39.5636	58.964
H3GA0056422	39.5732	59.021
MARC0064594	39.6116	59.078
ALGA0109862	39.6917	59.135
DRGA0008564	39.8267	59.135
ASGA0038709	39.8413	59.156
ALGA0047689	39.8515	59.194
ASGA0038699	40.0205	59.211
ALGA0047680	40.0517	59.227
MARC0085231	40.1681	59.254
H3GA0054093	40.2038	59.254
ALGA0047701	40.2195	59.276
MARC0009529	40.2465	59.276
DRGA0008567	40.2768	59.289
ALGA0047699	40.2953	59.289
DBUN0002471	40.334	59.289
ASGA0038720	40.3748	59.289
M1GA0011926	40.4588	59.289
MARC0013063	40.4832	59.289
ALGA0047705	40.5057	59.289
H3GA0024804	40.7775	59.289
ALGA0047711	40.7973	59.289
MARC0015623	40.8344	59.715
ASGA0038734	40.8526	59.804
ALGA0047715	40.8842	60.143
MARC0107397	40.9199	60.143
ALGA0047717	41.0269	60.143
H3GA0056066	41.0478	60.143
MARC0087618	41.0504	60.143
MARC0042292	41.0594	60.143
H3GA0024812	41.1236	60.143
H3GA0024807	41.1773	60.143
MARC0112642	41.1982	60.143
ASGA0038742	41.2428	60.143
H3GA0024811	41.2717	60.143
MARC0057223	41.3691	60.998
ASGA0098590	41.3725	60.998
ALGA0111031	41.3955	60.998
ASGA0038765	41.4648	60.998
MARC0056555	41.5151	60.998
ALGA0047756	41.5619	60.998
H3GA0024817	41.5955	60.998
SIRI0000767	41.6329	60.998
MARC0091567	41.6449	60.998
ALGA0123883	41.7258	61.613
ALGA0109821	41.7994	61.613
MARC0076019	41.811	61.865
ASGA0038769	41.8232	62.116
H3GA0024821	41.8572	62.116
ALGA0047767	41.9058	62.116
ALGA0047768	41.9706	62.116
ALGA0047774	42.055	62.116
ALGA0047776	42.0897	62.116
ALGA0047777	42.0946	62.116
DRGA0008574	42.1509	62.116
MARC0015431	42.1919	62.116
H3GA0024830	42.2116	62.116
H3GA0024829	42.2246	62.116
MARC0056851	42.2839	62.116
ASGA0092536	42.3787	62.116
ASGA0101319	42.5232	62.116
ASGA0103606	42.5371	62.116
DBWU0000638	42.6214	62.116
ALGA0112291	42.68	62.116
ASGA0039228	42.7519	68.885
MARC0084696	43.2044	69.265
MARC0034580	43.4258	69.644
ALGA0115258	43.6516	70.024
ALGA0047803	43.7637	70.403
ALGA0048617	44.0014	70.783
H3GA0024843	44.0389	70.783
ASGA0039334	44.0418	70.783
MARC0006333	44.0598	70.783
ALGA0047811	44.0748	70.783
H3GA0025163	44.089	70.783
ALGA0048621	44.1191	70.783
ASGA0038786	45.363	75.665
DIAS0004221	45.3956	75.665
ALGA0047817	45.4816	75.665
ASGA0084606	45.7505	75.665
ALGA0047825	46.1309	75.665
MARC0039159	46.4478	75.665
MARC0075425	46.7069	75.665
MARC0029724	47.0358	75.665
M1GA0011935	47.4342	75.665
ALGA0047834	47.4986	75.665
ASGA0038791	47.5394	75.665
ALGA0047829	47.5603	75.665
H3GA0024856	47.5829	75.665
MARC0029846	48.65	77.318
MARC0085941	49.0273	79.048
ASGA0098917	49.112	79.048
ALGA0047844	49.4272	79.048
ALGA0048824	49.7401	79.048
ALGA0048825	49.7647	79.048
ALGA0106261	49.8811	79.048
ASGA0038797	50.0294	79.048
ALGA0047848	50.0968	79.048
MARC0093074	50.2235	79.048
H3GA0024861	50.3296	79.048
H3GA0024862	50.3597	79.048
ASGA0038801	50.4074	79.048
H3GA0024868	50.4792	79.048
H3GA0052920	50.5036	79.048
ASGA0038804	50.5379	79.048
MARC0040250	50.5823	79.048
MARC0021139	50.6393	79.048
ALGA0108841	50.6702	79.048
CASI0007301	50.7264	79.048
ASGA0089243	50.7348	79.048
ALGA0047862	50.8515	79.048
ALGA0047863	50.8639	79.048
MARC0063673	51.0181	79.048
MARC0038980	51.0707	79.048
ASGA0038810	51.0936	79.048
H3GA0024872	51.1128	79.048
INRA0029812	51.1411	79.048
INRA0029815	51.1643	79.048
INRA0029816	51.2357	79.048
ALGA0047870	51.4645	79.048
ALGA0047871	51.5088	79.048
DRGA0008588	51.5807	79.048
MARC0056888	51.6235	79.048
MARC0062012	51.9427	79.048
H3GA0024875	52.1343	79.048
ALGA0047876	52.2136	79.048
ALGA0047879	52.3016	79.048
ALGA0047880	52.3336	79.048
DBWU0000622	52.5139	79.048
H3GA0024876	52.5421	79.048
DBWU0000619	52.5654	79.048
ASGA0038814	52.6792	79.048
INRA0029819	53.3867	79.048
MARC0071439	53.5553	79.048
MARC0077695	53.9292	79.048
ALGA0047885	54.2289	79.048
MARC0076384	54.4668	79.048
H3GA0024878	55.2554	79.048
INRA0029827	55.3328	79.048
MARC0017124	55.5296	79.048
ALGA0047895	55.6479	79.048
H3GA0024880	55.67	79.048
ALGA0047893	55.691	79.048
H3GA0024879	55.7491	79.048
ALGA0111390	55.9314	79.048
ALGA0047896	56.0644	79.048
ASGA0038818	56.1754	79.048
MARC0045470	56.2552	79.048
H3GA0024884	56.6429	79.048
ASGA0038820	56.6735	79.048
H3GA0024882	56.6953	79.048
ASGA0038822	56.7645	79.048
ALGA0047901	56.8051	79.048
MARC0013221	57.2627	79.048
ALGA0047910	57.5311	79.048
ALGA0047912	57.5882	79.048
ALGA0047914	57.6254	79.048
ALGA0047919	57.7421	79.048
ASGA0038830	57.7498	79.048
H3GA0024887	57.7806	79.048
DIAS0004663	57.7983	79.048
MARC0070843	57.8257	79.048
MARC0043573	57.8485	79.048
ASGA0038834	57.9293	79.048
ALGA0047920	57.9603	79.048
ALGA0047923	58.001	79.048
H3GA0024889	58.0256	79.048
ALGA0047922	58.0363	79.048
MARC0067007	58.1184	79.048
MARC0052300	58.1441	79.048
MARC0035425	58.3029	79.048
ALGA0115560	58.3802	79.048
H3GA0056398	58.4139	79.048
ALGA0047927	58.4267	79.048
INRA0029832	58.467	79.048
ALGA0047931	58.4932	79.048
ALGA0047932	58.5579	79.048
H3GA0024894	58.5983	79.048
ALGA0047933	58.6258	79.048
ASGA0038843	58.6741	79.048
MARC0001322	58.7033	79.048
M1GA0011944	58.8076	79.048
ASGA0038852	58.9013	79.059
ASGA0100508	59.0028	79.07
MARC0041089	59.081	79.07
ALGA0047950	59.3487	79.07
ALGA0047953	59.4916	79.07
MARC0062246	59.5339	79.07
MARC0036671	59.5783	79.07
ALGA0047955	59.9577	79.07
MARC0020164	60.1019	79.07
ASGA0082278	60.2419	79.095
ALGA0049637	60.6898	79.461
H3GA0025501	60.721	79.461
DBWU0000670	60.7705	79.65
DRGA0008593	60.8475	79.669
INRA0029835	60.9815	79.717
ALGA0047958	61.1005	79.765
H3GA0024897	61.1808	79.784
MARC0040880	61.2842	79.803
MARC0105512	61.4029	79.876
MARC0001802	61.4448	79.876
MARC0068290	61.7294	79.876
H3GA0024898	61.8639	79.876
ALGA0114185	61.8729	79.876
ALGA0047961	62.4143	79.876
INRA0029837	62.8387	79.876
MARC0064305	63.0624	79.876
ALGA0047963	63.1194	79.876
DRGA0008595	63.3655	79.876
ALGA0047969	63.3962	79.876
MARC0025428	63.4092	79.876
ALGA0047974	63.4757	79.876
H3GA0024901	63.6809	79.876
MARC0005813	63.8264	79.876
MARC0008870	63.8387	79.876
ALGA0047979	64.3185	79.876
H3GA0024903	64.3559	79.876
ASGA0038865	64.4098	79.876
ALGA0047981	64.5584	79.876
ALGA0047982	64.6021	79.876
DBWU0000675	64.6882	79.876
DRGA0008598	64.7191	79.876
ALGA0113849	64.7938	79.876
ALGA0047986	64.9464	79.876
H3GA0024905	65.0274	79.876
ALGA0047988	65.0749	79.876
INRA0029842	65.1651	79.876
ALGA0047989	65.172	79.876
ALGA0047992	65.4891	79.876
MARC0058200	65.5718	79.876
ALGA0047995	65.6272	79.876
ALGA0047997	65.7763	79.876
MARC0100645	65.7975	79.876
MARC0051033	66.027	79.876
ALGA0048001	66.0726	79.876
DRGA0008601	66.133	79.876
ALGA0048006	66.4908	79.876
ASGA0038870	66.5626	79.876
ALGA0048014	66.6227	79.876
ALGA0048013	66.6816	79.876
MARC0058005	66.7879	79.876
DRGA0008603	66.8471	79.876
MARC0000554	67.0261	79.876
ALGA0048023	67.0906	79.876
ALGA0048019	67.1154	79.876
DRGA0008609	67.4305	79.876
ALGA0048027	67.4984	79.876
H3GA0024924	67.5467	79.876
MARC0084543	67.5682	79.876
MARC0050311	67.5979	79.876
ALGA0048032	67.6693	79.876
CASI0009341	67.8888	79.876
ALGA0048036	67.9112	79.876
ASGA0085363	68.055	79.876
ASGA0038876	68.094	79.876
DRGA0008613	68.2064	79.876
ALGA0048039	68.2352	79.876
DRGA0008614	68.5244	79.876
ALGA0048042	68.5708	79.876
H3GA0024926	68.6763	79.876
ALGA0048043	68.711	79.876
ASGA0038877	68.7598	79.876
ALGA0048045	68.7828	79.876
ALGA0048048	68.8274	79.876
ALGA0048051	68.8526	79.876
DRGA0008615	68.866	79.876
ALGA0048053	68.8964	79.876
ALGA0108174	69.0396	79.876
ASGA0085207	69.066	79.876
MARC0020237	69.0704	79.876
MARC0095739	69.1465	79.876
ALGA0103392	69.1469	79.876
ALGA0102491	69.2157	79.876
ASGA0038884	69.3933	79.876
ALGA0048059	69.4444	79.876
H3GA0024937	69.4669	79.876
MARC0069589	69.5862	79.876
H3GA0024938	69.6223	79.876
MARC0111015	69.6623	79.876
DRGA0008620	69.8654	79.876
ISU10000067	69.9122	79.876
DRGA0008621	69.9509	79.876
DRGA0008622	69.9736	79.876
INRA0029873	69.9987	79.876
ASGA0038898	70.0334	79.876
MARC0048968	70.0969	79.876
DRGA0008624	70.1481	79.876
MARC0066962	70.4906	79.876
ALGA0104073	70.6905	79.876
MARC0026980	70.9379	79.876
MARC0048950	70.9918	79.876
MARC0104889	71.0426	79.876
MARC0030810	71.4056	79.876
ASGA0088496	71.4097	79.876
DIAS0003309	71.5098	79.876
H3GA0024939	71.5551	79.876
ASGA0038900	71.5739	79.876
INRA0029885	71.6036	79.876
ASGA0038901	71.6692	79.876
INRA0029890	71.6877	79.876
ALGA0109302	71.8479	79.876
MARC0063931	72.0779	79.876
DIAS0002150	72.2481	79.876
MARC0067726	72.2663	79.876
INRA0029891	72.39	79.876
ASGA0038904	72.4346	79.876
MARC0021611	72.5672	79.876
M1GA0027035	72.6432	79.876
ASGA0038909	72.6569	79.876
MARC0059165	72.678	79.876
MARC0025729	72.7855	79.876
ASGA0038905	72.815	79.876
ASGA0099732	72.877	79.876
ASGA0038910	72.8935	79.876
ASGA0095741	72.9343	79.876
MARC0071875	73.0366	79.876
CASI0009910	73.1088	79.876
MARC0107119	73.1174	79.876
INRA0029897	73.2206	79.876
ASGA0038912	73.2658	79.876
MARC0029095	73.279	79.876
ALGA0048087	73.2861	79.876
DIAS0000495	73.3551	79.876
ALGA0048091	73.3695	79.876
DIAS0000042	73.4263	79.876
DIAS0000043	73.4302	79.876
MARC0109837	73.6119	79.876
ASGA0100173	73.6752	79.876
MARC0089979	73.787	80.186
ALGA0048092	73.8109	80.23
H3GA0024941	73.8414	80.23
ALGA0048094	73.8639	80.23
ASGA0038917	73.9048	80.23
ALGA0048095	73.9269	80.23
ALGA0048099	74.017	80.23
ASGA0038924	74.0791	80.23
ALGA0048107	74.1377	80.23
H3GA0024946	74.2305	80.23
MARC0006179	74.3214	80.23
ALGA0105214	74.388	80.23
MARC0039910	74.4161	80.23
MARC0103006	74.4908	80.23
ALGA0115967	74.4913	80.23
ALGA0112196	74.5117	80.23
ALGA0117771	74.5292	80.23
MARC0094498	74.604	80.25
ASGA0038928	74.6373	80.25
ALGA0048112	74.6855	80.301
ALGA0048114	74.7363	80.332
ALGA0115182	74.771	80.363
ALGA0101320	74.7719	80.394
MARC0053045	74.8793	80.438
MARC0043064	74.9341	80.481
MARC0052115	74.9769	80.493
MARC0022851	75.0639	80.504
ALGA0048115	75.0742	80.52
H3GA0024948	75.0926	80.562
ALGA0048118	75.1295	80.562
ALGA0048119	75.1726	80.582
ASGA0038938	75.1908	80.582
MARC0112752	75.2165	80.582
ALGA0048121	75.2422	80.582
ALGA0121925	75.2472	80.582
MARC0041940	75.3523	80.582
DRGA0017661	75.3823	80.582
MARC0033881	75.5593	80.582
DIAS0001639	75.5741	80.582
ALGA0048131	75.6362	80.582
ALGA0048133	75.6487	80.582
ASGA0038951	75.6626	80.582
M1GA0011960	75.6834	80.582
H3GA0024955	75.6995	80.582
DIAS0004521	75.711	80.582
MARC0065725	75.7169	80.582
ALGA0048135	75.7545	80.582
MARC0061405	75.8211	80.582
DBUN0001001	75.8313	80.582
ASGA0038962	75.9093	80.582
MARC0003681	75.9269	80.582
ASGA0038965	75.9613	80.582
ALGA0048142	75.9817	80.582
MARC0000132	76.1095	80.582
ALGA0048144	76.136	80.582
M1GA0011961	76.1813	80.582
MARC0010041	76.2168	80.582
MARC0025390	76.2639	80.582
ALGA0048150	76.3112	80.582
ALGA0048152	76.333	80.582
ALGA0048154	76.355	80.582
ALGA0048158	76.3702	80.582
ASGA0038983	76.3926	80.582
ASGA0099932	76.4024	80.582
MARC0090835	76.404	80.582
ASGA0093827	76.5502	80.582
ASGA0085658	76.611	80.582
MARC0002409	76.6248	80.582
MARC0053929	76.6348	80.582
DIAS0001609	76.641	80.582
ASGA0098623	76.6573	80.582
M1GA0025365	76.6692	80.582
ASGA0092219	76.6733	80.582
MARC0019210	76.6971	80.582
ALGA0048169	76.7149	80.651
ASGA0038996	76.7375	80.651
ASGA0038984	76.7881	80.651
ASGA0038989	76.8277	80.651
CASI0010057	76.8658	80.754
MARC0024865	76.8859	80.754
DRGA0008641	76.9401	80.754
ALGA0048178	76.9779	80.754
ALGA0048179	77.0213	80.754
ASGA0039000	77.0428	80.813
ALGA0048183	77.1016	80.863
MARC0102191	77.1043	80.913
H3GA0024969	77.1244	80.962
ALGA0048186	77.174	80.962
ASGA0102002	77.2695	80.962
ALGA0048203	77.3134	80.962
ASGA0039004	77.3201	80.962
ALGA0048195	77.3482	80.962
ASGA0039005	77.3599	80.962
MARC0071582	77.4089	80.962
MARC0109188	77.5795	80.962
MARC0015242	77.7809	80.962
ASGA0092986	77.8222	80.962
ALGA0123679	77.8861	80.962
ASGA0104012	77.891	80.962
ASGA0089970	77.8975	80.962
H3GA0053305	77.8983	80.962
MARC0045989	77.9048	80.962
ASGA0102538	77.9662	80.962
MARC0055519	78.0603	80.962
MARC0062445	78.1395	80.962
DIAS0000521	78.168	80.962
H3GA0024981	78.2092	80.962
ALGA0048227	78.3149	80.962
M1GA0011966	78.3323	80.962
H3GA0024980	78.4101	80.962
ALGA0048225	78.4226	80.962
ALGA0102419	78.5195	80.962
M1GA0011968	78.5705	80.962
MARC0072634	78.5782	80.962
ALGA0048252	78.6244	80.962
ALGA0048253	78.6717	80.962
MARC0084640	78.7726	80.962
ALGA0048266	78.8071	80.962
MARC0044635	78.82	80.962
ASGA0039044	78.8439	80.962
ASGA0039033	78.8707	80.962
DIAS0004218	78.9382	80.962
ALGA0112460	79.1778	80.962
MARC0069337	79.1878	80.962
MARC0115233	79.309	81.343
MARC0047659	79.4101	81.723
ASGA0105614	79.5067	81.723
MARC0109190	79.5127	81.723
MARC0071224	79.5432	81.723
MARC0045109	79.558	81.723
ASGA0100546	79.5717	81.723
MARC0059309	79.602	81.723
ASGA0100738	79.6827	81.723
ASGA0100904	79.688	81.723
ASGA0096419	79.7188	81.723
ALGA0108020	79.8088	81.723
MARC0031511	79.996	81.723
ALGA0113773	80.0381	81.723
ALGA0106563	80.0486	81.723
MARC0044626	80.0857	81.723
MARC0084578	80.3442	81.723
MARC0020286	80.3611	81.723
MARC0101213	80.3878	81.723
MARC0044036	80.4154	81.723
ALGA0117948	80.4273	81.723
H3GA0025004	80.4366	81.723
MARC0090119	80.4568	81.723
ASGA0039066	80.5037	81.723
ALGA0048280	80.5272	81.723
ALGA0048275	80.5555	81.723
ALGA0048273	80.5711	81.723
ALGA0048270	80.5989	81.723
ALGA0117425	80.6774	81.723
MARC0058045	80.6814	81.723
ASGA0083967	80.6845	81.723
ASGA0093454	80.6945	81.723
MARC0104059	80.7536	81.723
MARC0033497	80.7586	81.723
MARC0097287	80.7748	81.723
MARC0084282	80.9731	81.723
H3GA0025014	81.0174	81.842
MARC0063991	81.0362	81.86
ASGA0039084	81.0628	81.879
ALGA0048299	81.0897	81.879
DRGA0008656	81.1259	82.012
DRGA0008655	81.136	82.012
MARC0065833	81.2046	82.027
ASGA0101844	81.2434	82.038
MARC0044613	81.2499	82.105
ASGA0103364	81.2699	82.12
ASGA0095699	81.2973	82.12
ALGA0105829	81.3794	82.12
ALGA0112373	81.4213	82.12
H3GA0039937	81.437	82.12
MARC0064781	81.4739	82.12
MARC0070555	81.5972	82.12
MARC0008576	81.6262	82.12
MARC0040492	81.6379	82.12
H3GA0054927	81.653	82.12
ALGA0112755	81.7349	82.12
ALGA0121819	81.8525	82.168
MARC0022930	81.8542	82.18
MARC0042080	81.9026	82.192
MARC0051132	82.012	82.212
ASGA0099193	82.0417	82.225
MARC0097685	82.1717	82.239
MARC0032054	82.1736	82.254
ASGA0039088	82.3785	82.27
CASI0003107	82.4034	82.282
ALGA0048305	82.5127	82.466
DRGA0008657	82.8683	82.466
ALGA0048308	83.0189	82.466
DRGA0008660	83.0428	82.466
ALGA0048310	83.2169	82.466
ALGA0048311	83.2559	82.466
MARC0003787	83.2808	82.466
ALGA0120072	83.6406	82.466
MARC0056190	83.6444	82.466
ALGA0112530	83.6446	82.466
ALGA0111951	83.7386	82.466
ASGA0105784	83.7407	82.466
ASGA0039102	83.8006	82.466
MARC0055215	83.8212	82.466
H3GA0025025	83.8396	82.466
MARC0031694	83.8768	82.466
ALGA0048318	83.9003	82.466
ASGA0104487	83.9128	82.466
H3GA0025019	83.9441	82.466
ASGA0100970	84.0297	82.466
MARC0059103	84.0347	82.466
MARC0020671	84.0564	82.466
ALGA0048335	84.1555	82.466
H3GA0025028	84.2189	82.466
ALGA0048340	84.2404	82.466
ALGA0048346	84.2993	82.466
ASGA0039113	84.3254	82.466
ALGA0048348	84.3444	82.466
ASGA0039115	84.3612	82.466
ALGA0048357	84.4256	82.466
ALGA0048355	84.4395	82.466
ALGA0048351	84.4654	82.466
ASGA0039116	84.4907	82.466
ASGA0101615	84.5827	82.466
MARC0054843	84.633	82.466
MARC0025678	84.8325	82.466
ALGA0048358	84.8557	82.466
ASGA0039121	84.8701	82.466
ALGA0048360	84.892	82.466
ASGA0039127	84.9318	82.466
ALGA0048364	84.9787	82.466
MARC0086323	85.0701	82.466
ASGA0039130	85.1183	82.466
ASGA0096210	85.2805	82.466
MARC0032575	85.404	82.466
MARC0063231	85.4465	82.466
MARC0078238	85.5548	82.466
ASGA0084086	85.6349	82.466
H3GA0055428	85.717	82.604
ASGA0098295	86.0164	82.711
ASGA0039133	86.1815	82.818
MARC0085484	86.2161	82.818
ASGA0039134	86.2319	82.856
DBNP0000662	86.2953	83.059
DRGA0008667	86.3876	83.262
ALGA0048379	86.4146	83.262
DRGA0008668	86.4664	83.262
MARC0075690	86.473	83.281
MARC0040937	86.528	83.281
MARC0114765	86.5528	83.281
INRA0030024	86.5823	83.281
ASGA0039139	86.6415	83.281
MARC0041739	86.6602	83.281
INRA0030029	86.6736	83.281
MARC0056839	86.8001	83.281
ALGA0048391	86.8886	83.281
DBWU0000660	86.9282	83.39
ASGA0089759	87.0005	83.554
ALGA0114110	87.0127	83.554
ALGA0114018	87.0481	83.577
ASGA0039146	87.1614	83.64
ASGA0039145	87.1774	83.64
ALGA0048393	87.2497	84.081
ASGA0039142	87.2528	84.081
ASGA0039148	87.2706	84.081
ALGA0048402	87.5441	84.242
MARC0023796	87.6186	84.404
ASGA0039152	87.6495	84.88
M1GA0011981	87.7051	84.88
ASGA0039155	87.741	84.88
MARC0029979	87.8664	84.88
MARC0084454	87.9393	84.88
ASGA0096925	87.9543	84.88
ALGA0048411	88.0361	84.88
MARC0040474	88.0662	84.88
ASGA0039159	88.1025	84.88
ASGA0039160	88.1287	84.88
MARC0049506	88.1637	84.88
MARC0089655	88.1767	84.88
H3GA0025066	88.329	84.88
H3GA0025064	88.3511	84.88
ASGA0039170	88.383	84.88
DRGA0008672	88.4027	84.88
DRGA0008674	88.4974	84.88
ASGA0039174	88.5128	84.88
MARC0075981	88.5713	84.88
DRGA0008675	88.6623	84.88
ASGA0039177	88.7285	84.937
MARC0020795	88.7788	84.937
MARC0067395	88.7814	84.937
MARC0057388	88.8287	85.048
MARC0027918	88.9094	85.159
MARC0095252	89.1622	85.27
ALGA0048438	89.2291	85.381
DBWU0000655	89.2583	85.381
ALGA0048448	89.312	85.381
DBMA0000056	89.346	85.381
ALGA0048452	89.3964	85.381
MARC0025310	89.4318	85.381
MARC0060387	89.4533	85.381
DRGA0017395	89.7192	85.381
ALGA0111293	89.7785	85.381
ALGA0102623	89.807	85.381
MARC0074396	89.8211	85.381
ASGA0090387	89.8323	85.381
ALGA0121501	89.8422	85.381
ASGA0099510	89.8696	85.381
MARC0054558	89.9053	85.381
ALGA0122094	89.9275	85.381
ASGA0088718	89.9442	85.381
DBWU0000652	89.9525	85.381
ALGA0048454	89.9815	85.381
ASGA0039198	90.0964	85.381
MARC0060217	90.1667	85.381
ASGA0093181	90.1882	85.381
ASGA0083007	90.2009	85.381
ALGA0048459	90.4006	85.381
MARC0097688	90.4845	85.381
ALGA0048462	90.5052	85.381
ALGA0048464	90.5239	85.381
ASGA0039203	90.5578	85.381
MARC0037169	90.6212	85.381
ALGA0048468	90.6523	85.381
H3GA0025089	90.6938	85.381
ASGA0039207	90.7327	85.381
MARC0070804	90.8574	85.381
ALGA0048471	90.9321	85.381
ALGA0048472	90.9512	85.381
MARC0063754	90.9725	85.381
ALGA0048480	90.9958	85.381
DRGA0008681	91.0335	85.381
MARC0015319	91.0588	85.381
CASI0010109	91.2113	85.381
ALGA0048485	91.2858	85.381
ALGA0048498	91.3503	85.381
H3GA0025104	91.3889	85.381
ALGA0048491	91.4438	85.381
DBWU0000650	91.5385	85.381
H3GA0025111	91.557	85.381
ALGA0048513	91.5716	85.381
ALGA0119228	91.6162	85.381
ALGA0048519	91.6852	85.381
ALGA0048516	91.7669	85.381
ALGA0048527	91.7729	85.381
ALGA0048521	91.7981	85.381
ASGA0039235	91.8282	85.381
ALGA0048544	91.9315	85.381
MARC0001971	91.9566	85.381
H3GA0025124	91.9695	85.381
M1GA0011992	91.9913	85.381
ALGA0048538	92.068	85.381
MARC0017670	92.0745	85.381
ASGA0091869	92.0878	85.381
ASGA0097476	92.1939	85.381
ALGA0115857	92.2396	85.381
ASGA0087166	92.3132	85.453
ALGA0115385	92.3336	85.693
ALGA0105705	92.3415	85.76
ASGA0082293	92.3637	85.898
MARC0048398	92.3839	85.898
ASGA0088259	92.3892	85.898
ALGA0110725	92.4069	85.898
ASGA0097276	92.4178	85.898
ASGA0089733	92.4238	85.898
ASGA0085336	92.4298	85.898
ALGA0119517	92.436	85.898
ASGA0092142	92.4437	85.898
ALGA0124080	92.5143	85.898
MARC0006934	92.5403	85.931
MARC0065288	92.5674	85.95
ALGA0113197	92.6412	85.969
ASGA0100530	92.6424	86.222
ASGA0089555	92.715	86.415
H3GA0054057	92.7154	86.415
ALGA0104311	92.7421	86.415
MARC0034870	92.7538	86.415
H3GA0025137	92.8039	86.415
ALGA0048572	92.8165	86.415
ASGA0039284	92.8406	86.415
H3GA0025135	92.8706	86.415
H3GA0025131	92.907	86.415
ASGA0039263	92.9219	86.415
ALGA0048560	92.9449	86.415
H3GA0025142	92.9639	86.415
MARC0051465	93.0657	86.415
ASGA0098338	93.0845	86.415
MARC0039382	93.1392	86.415
MARC0055808	93.1481	86.415
DIAS0001136	93.1482	86.415
ALGA0048583	93.2099	86.415
ASGA0039296	93.2532	86.415
DRGA0008692	93.2657	86.415
H3GA0025148	93.2681	86.415
MARC0024098	93.2953	86.415
MARC0061487	93.3204	86.415
MARC0032253	93.3604	86.415
ALGA0048582	93.3903	86.415
ISU10000576	93.4813	86.415
ASGA0097001	93.4898	86.415
ASGA0093076	93.4939	86.415
MARC0029000	93.494	86.415
ALGA0115296	93.4961	86.415
ALGA0108408	93.529	86.415
ALGA0106605	93.5356	86.415
ALGA0117735	93.5759	86.415
MARC0005229	93.6181	86.415
SIRI0001238	93.6349	86.415
ALGA0048589	93.6558	86.415
ALGA0048594	93.7215	86.415
ALGA0124361	93.7564	86.415
MARC0020530	93.7725	86.415
ALGA0048597	93.7876	86.415
ASGA0039312	93.7993	86.415
DRGA0008696	93.8206	86.415
ASGA0039330	93.8458	86.932
H3GA0025162	93.8653	86.932
ALGA0048606	93.9156	86.932
MARC0056998	93.9563	87.117
MARC0093552	94.3037	87.309
ALGA0113503	94.4274	87.309
MARC0097057	94.7312	87.309
MARC0018819	94.7641	87.309
ALGA0048625	94.7902	87.309
ALGA0048628	94.8752	87.309
MARC0093684	94.9619	87.309
ALGA0048631	94.9945	87.309
MARC0056102	95.0248	87.309
CASI0010058	95.0637	87.309
MARC0073866	95.13	87.309
ASGA0089323	95.2717	87.309
H3GA0025170	95.5695	87.309
MARC0110399	95.585	87.309
H3GA0025172	95.6967	87.309
ALGA0048647	95.7494	87.309
ASGA0039343	95.8562	87.309
INRA0030105	95.905	87.309
MARC0071693	95.9814	87.309
ASGA0099228	96.0517	87.309
ASGA0091803	96.3102	87.309
MARC0001527	96.6495	87.309
ASGA0039347	96.7568	87.309
ALGA0048654	96.7755	87.309
ALGA0048656	96.8835	87.309
ASGA0039348	96.9185	87.309
MARC0087714	96.9409	87.309
ALGA0048658	96.963	87.309
ALGA0048659	96.992	87.309
ALGA0105930	97.2855	87.309
ALGA0115175	97.4193	87.309
ASGA0039349	97.709	87.309
INRA0030117	97.7508	87.309
ALGA0048667	97.9311	87.309
MARC0051570	97.9415	87.309
MARC0031007	98.5473	87.309
ASGA0039359	98.614	87.309
ASGA0039361	98.6272	87.309
ALGA0048677	98.6673	87.309
ASGA0039355	98.7107	87.309
ALGA0048673	98.7552	87.309
INRA0030121	98.9424	87.309
ASGA0039362	98.9855	87.309
ASGA0039365	99.0275	87.309
H3GA0025183	99.0508	87.309
ALGA0048684	99.2405	87.309
ASGA0039369	99.334	87.309
ASGA0039371	99.3666	87.309
ALGA0048696	99.4933	87.309
ALGA0103150	99.6346	87.309
MARC0109916	99.6619	87.309
MARC0048804	99.7224	87.309
H3GA0025190	99.748	87.309
ALGA0048700	99.7969	87.309
ALGA0048708	99.8999	87.309
MARC0030953	99.9284	87.309
ALGA0048703	99.969	87.309
ASGA0039378	100.22	87.309
ASGA0104034	100.394	87.309
ALGA0048717	100.629	87.309
INRA0030146	100.645	87.309
INRA0030143	100.678	87.309
INRA0030153	100.707	87.309
MARC0035880	100.726	87.309
INRA0030157	100.744	87.309
ASGA0039382	100.851	87.309
CASI0009346	100.89	87.309
ASGA0039385	100.921	87.309
MARC0065768	101.158	87.309
ASGA0100149	101.267	87.309
ALGA0119691	101.417	87.309
MARC0059035	101.71	87.309
MARC0002792	101.773	87.309
ASGA0039391	101.976	87.309
ALGA0048720	102.009	87.309
MARC0045606	102.031	87.309
ASGA0039389	102.058	87.309
ALGA0048723	102.07	87.309
ALGA0048730	102.095	87.309
M1GA0012006	102.136	87.309
DRGA0008716	102.205	87.309
DRGA0008717	102.254	87.309
H3GA0025195	102.317	87.309
ALGA0048735	102.359	87.309
ASGA0039395	102.403	87.309
ALGA0048732	102.433	87.309
SIRI0000287	102.554	87.309
ASGA0096519	102.572	87.309
CASI0008301	102.587	87.309
MARC0059517	102.631	87.309
ALGA0048737	102.73	87.309
DRGA0008718	102.887	87.309
ALGA0048742	102.915	87.309
ALGA0120198	103.005	87.309
DIAS0004304	103.043	87.309
INRA0030178	103.139	87.309
MARC0049326	103.24	87.309
MARC0022286	103.299	87.309
ALGA0048745	103.343	87.309
ASGA0039402	103.364	87.309
ALGA0048747	103.395	87.309
MARC0060437	103.422	87.309
ALGA0048753	103.446	87.309
MARC0035484	103.516	87.309
ALGA0111295	103.534	87.309
ALGA0124320	103.536	87.309
H3GA0025203	103.563	87.309
ALGA0048755	103.585	87.309
ASGA0039409	103.613	87.309
ALGA0048756	103.67	87.309
INRA0030181	103.703	87.309
MARC0038016	103.726	87.309
ALGA0048759	104.002	87.309
ASGA0039416	104.101	87.309
ALGA0048764	104.185	87.309
ALGA0048765	104.209	87.309
INRA0030184	104.234	87.309
INRA0030185	104.274	87.309
INRA0030188	104.342	87.309
DRGA0008720	104.389	87.309
H3GA0025206	104.415	87.309
ASGA0039421	104.439	87.309
INRA0030189	104.496	87.309
MARC0014253	104.662	87.309
ALGA0102245	104.961	87.681
ASGA0102045	105.079	87.745
ASGA0105040	105.185	87.745
ASGA0091052	105.254	87.745
ALGA0048786	105.458	87.745
ASGA0039426	105.55	87.745
MARC0027716	105.82	87.745
MARC0111039	105.992	87.745
ALGA0108046	106.188	87.745
ALGA0103920	106.271	87.745
ASGA0086775	106.293	87.745
MARC0109507	106.351	87.745
MARC0011510	106.382	87.745
ALGA0048798	106.509	87.745
H3GA0025212	106.616	87.745
ASGA0098294	106.661	87.745
ASGA0097890	106.694	87.745
MARC0003708	106.696	87.745
ALGA0113616	106.812	87.745
MARC0024679	106.825	87.745
ASGA0091437	106.921	87.745
ALGA0048805	107.037	87.745
ALGA0048810	107.094	87.745
ALGA0048813	107.12	87.745
ASGA0039438	107.146	87.745
H3GA0025221	107.186	87.745
INRA0030202	107.424	87.745
H3GA0025223	107.442	87.745
ALGA0048819	107.496	87.745
ASGA0039441	107.601	87.816
ALGA0048829	107.67	87.999
ALGA0117660	107.683	88.182
MARC0056897	107.706	88.182
ALGA0119219	107.725	88.182
MARC0023064	107.82	88.182
ASGA0093441	107.834	88.182
ALGA0111705	107.928	88.182
ASGA0092033	107.941	88.182
ALGA0113244	107.954	88.182
INRA0030204	108.069	88.182
DIAS0002537	108.11	88.182
ALGA0048837	108.117	88.182
H3GA0025229	108.234	88.182
ALGA0048843	108.279	88.182
MARC0098237	108.321	88.182
MARC0054364	108.345	88.182
ASGA0039446	108.38	88.182
DIAS0001195	108.43	88.182
ALGA0048854	108.62	88.182
MARC0056114	108.681	88.182
MARC0103989	108.7	88.182
ASGA0039451	108.734	88.182
ALGA0048860	108.759	88.182
ALGA0048863	108.84	88.182
ALGA0048866	108.892	88.182
ASGA0101872	108.9	88.182
INRA0057755	108.903	88.182
MARC0051357	108.904	88.182
INRA0030215	108.925	88.182
ALGA0048868	108.95	88.182
CASI0007303	108.967	88.182
CASI0006572	108.983	88.182
H3GA0025236	109.016	88.182
H3GA0025237	109.067	88.182
ASGA0039455	109.102	88.182
ASGA0039457	109.151	88.182
MARC0017963	109.214	88.182
H3GA0025242	109.273	88.182
ASGA0039463	109.332	88.182
MARC0071612	109.379	88.182
ALGA0048895	109.405	88.182
ALGA0122904	109.553	88.182
ALGA0048908	109.609	88.182
ALGA0123481	109.614	88.182
ALGA0048900	109.632	88.182
ALGA0114495	109.646	88.182
ALGA0048916	109.652	88.182
ALGA0123960	109.674	88.182
ASGA0085086	109.682	88.182
ALGA0048935	109.758	88.182
ASGA0039480	109.779	88.182
ASGA0039477	109.801	88.182
ASGA0039476	109.828	88.182
ALGA0048918	109.852	88.182
DIAS0002687	110.016	88.182
ALGA0111939	110.05	88.182
ALGA0048953	110.411	88.182
H3GA0025259	110.422	88.182
ASGA0039488	110.497	88.182
ASGA0039485	110.521	88.182
MARC0056877	110.658	88.182
MARC0110813	110.663	88.182
ASGA0097735	110.666	88.182
ASGA0092078	110.735	88.182
ASGA0096888	110.823	88.182
MARC0026403	111.007	88.182
CASI0007226	111.078	88.182
ALGA0112879	111.104	88.182
ASGA0039489	111.375	88.182
ASGA0039491	111.454	88.182
DIAS0001466	111.488	88.182
H3GA0025261	111.502	88.182
ALGA0048961	111.527	88.182
H3GA0025264	111.567	88.182
INRA0030289	111.595	88.182
ALGA0114369	111.62	88.182
MARC0048217	111.775	88.182
ALGA0119048	112.078	88.182
ALGA0104608	112.119	88.182
MARC0072303	112.164	88.182
DBKK0000239	112.418	88.182
H3GA0025268	112.44	88.182
ASGA0039501	112.468	88.182
ALGA0048970	112.483	88.182
ALGA0048971	112.504	88.182
ALGA0048976	112.526	88.182
MARC0067083	112.545	88.182
ASGA0039500	112.567	88.182
MARC0054726	112.598	88.182
M1GA0012018	112.637	88.182
H3GA0025269	112.644	88.182
ALGA0048982	112.68	88.182
ASGA0039521	112.685	88.182
ASGA0039519	112.746	88.182
ALGA0048990	112.749	88.182
ALGA0049004	112.768	88.182
ALGA0049005	112.82	88.182
ALGA0049011	112.856	88.182
ASGA0039529	112.886	88.182
ALGA0049016	112.951	88.282
MARC0067191	112.966	88.299
ALGA0049017	112.977	88.316
ASGA0039535	112.989	88.316
ALGA0049025	113.051	88.657
H3GA0025281	113.079	88.657
ALGA0049040	113.154	88.657
ASGA0039540	113.28	88.657
ALGA0049048	113.306	88.657
ALGA0049051	113.393	89.135
H3GA0025290	113.529	89.613
ASGA0039557	113.606	89.613
INRA0030342	113.629	89.613
ALGA0049057	113.642	89.613
ASGA0039556	113.664	89.613
MARC0113476	113.826	89.613
ALGA0049066	114.008	89.613
MARC0019808	114.17	89.645
MARC0113514	114.201	89.645
H3GA0025295	114.213	89.645
ALGA0049074	114.238	89.665
ALGA0049076	114.256	89.665
MARC0049164	114.349	89.677
ALGA0049082	114.376	89.677
DRGA0008736	114.393	89.677
DRGA0008737	114.408	89.694
INRA0030369	114.437	89.712
ASGA0099814	114.555	89.73
ALGA0109179	114.574	89.743
MARC0078539	114.623	89.779
ASGA0039572	114.684	89.812
ALGA0049088	114.685	89.829
ALGA0049090	114.735	89.846
UMB10000118	115.198	89.883
ALGA0114838	115.427	89.921
ASGA0094556	115.433	89.921
ALGA0049096	115.568	89.962
ALGA0049099	115.647	90.002
ALGA0115636	115.896	90.048
ALGA0106572	115.968	90.127
MARC0052366	115.99	90.127
ASGA0091541	116.042	90.127
CASI0006714	116.175	90.127
SIRI0000169	116.175	90.127
ASGA0088873	116.229	90.127
ALGA0113872	116.29	90.127
ALGA0108985	116.365	90.127
MARC0111228	116.428	90.127
ALGA0049103	116.721	90.127
ASGA0039582	116.806	90.127
H3GA0025305	116.837	90.127
ASGA0039584	116.864	90.127
ALGA0049107	116.914	90.127
ASGA0039586	116.936	90.127
ASGA0039589	116.983	90.127
ALGA0049111	116.996	90.127
ALGA0049113	117.018	90.127
ALGA0049118	117.043	90.127
H3GA0056737	117.177	90.127
MARC0052368	117.21	90.127
ALGA0110609	117.27	90.127
MARC0106156	117.3	90.127
MARC0045041	117.331	90.127
INRA0060874	117.333	90.127
ALGA0110747	117.356	90.127
MARC0092848	117.359	90.127
ASGA0095585	117.361	90.127
CASI0007750	117.371	90.127
ALGA0049119	117.394	90.127
MARC0066784	117.424	90.127
ASGA0039595	117.439	90.127
ALGA0049122	117.456	90.127
ALGA0049130	117.486	90.127
ALGA0049135	117.548	90.127
ALGA0049137	117.627	90.127
ALGA0049141	117.648	90.127
ALGA0049139	117.666	90.127
ALGA0049150	117.756	90.127
ASGA0039605	117.788	90.127
MARC0089928	117.807	90.672
ALGA0049156	117.824	91.153
MARC0006250	117.871	91.634
ASGA0039614	117.903	91.634
ASGA0039617	117.924	91.634
H3GA0025318	117.96	91.634
ALGA0049173	117.982	91.634
ALGA0049176	117.994	91.634
ALGA0112327	118.171	91.634
ALGA0103269	118.285	91.634
MARC0105365	118.353	91.634
MARC0008579	118.421	91.634
MARC0072830	118.516	91.634
MARC0001137	118.816	91.634
MARC0040294	118.816	91.634
MARC0081452	118.874	91.634
MARC0108511	119.138	91.634
MARC0032237	119.254	91.634
MARC0005317	119.377	91.634
ALGA0118007	119.429	91.634
ASGA0087256	119.705	91.634
MARC0091202	119.721	91.634
SIRI0000509	119.728	91.634
INRA0030422	119.851	91.715
H3GA0025321	119.888	91.781
H3GA0025322	119.942	92.547
ALGA0049192	119.965	92.547
DIAS0002802	119.985	92.547
MARC0030774	120.029	92.547
ALGA0049206	120.051	92.547
ALGA0049202	120.104	92.547
ASGA0091658	120.254	92.547
ASGA0039629	120.311	92.547
ALGA0104546	120.358	93.021
ASGA0039638	120.418	93.496
ALGA0049219	120.456	93.496
MARC0049679	120.478	93.496
INRA0030430	120.504	93.496
ALGA0049216	120.517	93.496
DIAS0001763	120.554	93.496
DIAS0003532	120.567	93.496
ASGA0039666	120.622	93.496
ASGA0039646	120.674	93.496
M1GA0012034	120.711	93.496
H3GA0025336	120.735	93.496
CASI0008396	120.736	93.496
ALGA0049235	120.746	93.496
M1GA0012035	120.763	93.496
ASGA0100490	120.794	93.496
MARC0025408	120.836	93.496
ASGA0096290	120.841	93.496
ALGA0049249	120.973	93.496
ALGA0049254	120.996	93.496
MARC0112204	121.026	93.496
ASGA0039670	121.039	93.496
ASGA0090428	121.326	93.496
MARC0051601	121.387	93.496
ALGA0105488	121.418	93.496
MARC0028605	121.472	93.496
ASGA0039671	121.558	93.496
ALGA0049258	121.581	93.838
DIAS0003598	121.68	93.985
ALGA0049269	121.743	94.133
ASGA0039681	121.788	94.133
ASGA0039683	121.829	94.133
ALGA0109533	121.91	94.133
ALGA0108851	122.072	94.133
ALGA0049273	122.209	94.133
MARC0069612	122.227	94.133
ALGA0049276	122.249	94.133
MARC0037703	122.289	94.768
DRGA0008747	122.318	94.768
[truncated: 566 more rows]
